# Supplementary material for: CTLA4-Ig immunosuppressive activity at the level of dendritic cell/T cell crosstalk
Source: PubMed Central journal article supplement — Int Immunopharmacol. 2013 Mar;15(3):638–45. doi: 10.1016/j.intimp.2013.02.007 (PMC3629566; doi:10.1016/j.intimp.2013.02.007), 2013-03
Supplement: mmc1.pdf [file mmc1.pdf]

S1

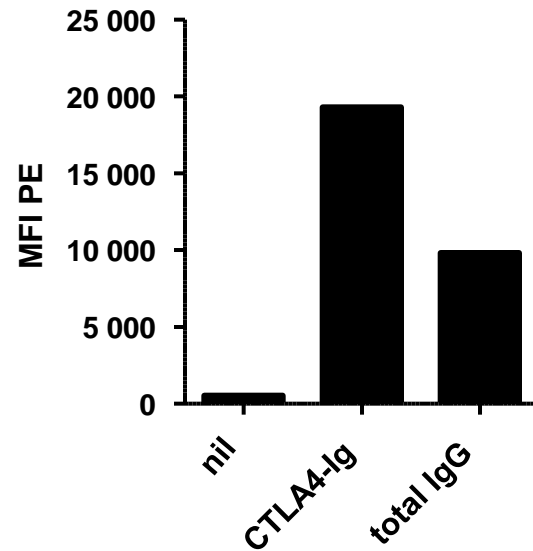

**Supplementary Figure 1.** PE labelled anti-IgG antibody specifically detects CTLA4-Ig bound to CD80 or CD86 molecules. C57BL/6 BMDCs were incubated without CTLA4-Ig, with CTLA4-Ig or with total human immunoglobulin (Beriglobin) at 37°C and stained with PE labelled anti-IgG antibody. MFI, mean fluorescence intensity. PE, phycoerythrin.

S2

| MLR           | Trp ( $\mu\text{Mol}$ ) | Kyn ( $\mu\text{Mol}$ ) |
|---------------|-------------------------|-------------------------|
| no CTLA4-Ig   | 92.0                    | 0.29                    |
| with CTLA4-Ig | 86.9                    | 0.26                    |

**Supplementary Table 1.** Tryptophan (Trp) and kynurenine (Kyn) concentrations measured by HPLC in cell culture supernatants after 3 days of MLR performed in the presence or absence of CTLA-4Ig (100 $\mu\text{g/ml}$ ).
